# Supplementary material for: The mecillinam resistome reveals a role for peptidoglycan endopeptidases in stimulating cell wall synthesis in Escherichia coli
Source: PubMed Central journal article supplement (PMC5549755; doi:10.1371/journal.pgen.1006934), 2017-07-27
Supplement: pgen.1006934.s006.pdf [file pgen.1006934.s006.pdf]

**Table S3. Strains used in this study.**

| Strain | Genotype <sup>a</sup>                                                                            | Source/Reference <sup>b</sup> |
|--------|--------------------------------------------------------------------------------------------------|-------------------------------|
| DH5α   | <i>F- hsdR17 deoR recA1 endA1 phoA supE44 thi-1 gyrA96 relA1 Δ(lacZYA-argF)U169 φ80dlacZΔM15</i> | Gibco BRL                     |
| TB10   | MG1655 $\lambda\Delta cro$ -bio <i>nad::Tn10</i>                                                 | [1]                           |
| MG1655 | <i>rph-1 ilvG rfb-50</i>                                                                         | [2]                           |
| TB28   | MG1655 $\Delta lacZYA::frt$                                                                      | [3]                           |
| GL38   | MG1655 $\Delta rcsB::frt$                                                                        | This study <sup>a</sup>       |
| GL44   | MG1655 $\Delta relA::frt$                                                                        | This study <sup>a</sup>       |
| GL74   | MG1655 $\Delta rfaP::Kan^R$                                                                      | This study <sup>a</sup>       |
| GL76   | MG1655 $\Delta rfaH::Kan^R$                                                                      | This study <sup>a</sup>       |
| GL82   | MG1655 $\Delta prc::Kan^R$                                                                       | This study <sup>a</sup>       |
| GL112  | MG1655 $\Delta rnt::Kan^R$                                                                       | This study <sup>a</sup>       |
| GL120  | MG1655 $\Delta efp::Kan^R$                                                                       | This study <sup>a</sup>       |
| GL122  | MG1655 $\Delta sspA::Kan^R$                                                                      | This study <sup>a</sup>       |
| AG04   | MG1655 $\Delta jpp::Kan^R$                                                                       | This study <sup>a</sup>       |
| HC408  | MG1655 $\Delta slit::Kan^R$                                                                      | This study <sup>a</sup>       |
| GL101  | MG1655 $\Delta arcA::Kan^R$                                                                      | This study <sup>a</sup>       |
| GL90   | MG1655 $\Delta gcvR::Kan^R$                                                                      | This study <sup>a</sup>       |
| GL92   | MG1655 $\Delta crr::Kan^R$                                                                       | This study <sup>a</sup>       |
| GL70   | MG1655 $\Delta lepA::Kan^R$                                                                      | This study <sup>a</sup>       |
| GL72   | MG1655 $\Delta trxB::Kan^R$                                                                      | This study <sup>a</sup>       |
| GL124  | MG1655 $\Delta cysE::Kan^R$                                                                      | This study <sup>a</sup>       |
| GL78   | MG1655 $\Delta pgm::Kan^R$                                                                       | This study <sup>a</sup>       |
| GL84   | MG1655 $\Delta npl::Kan^R$                                                                       | This study <sup>a</sup>       |
| GL80   | MG1655 $\Delta opgH::Kan^R$                                                                      | This study <sup>a</sup>       |
| GL206  | MG1655 $\Delta nlpD::Kan^R$                                                                      | This study <sup>a</sup>       |

|       |                                                                                                              |                         |
|-------|--------------------------------------------------------------------------------------------------------------|-------------------------|
| GL66  | MG1655 $\Delta tufA::Kan^R$                                                                                  | This study <sup>a</sup> |
| GL204 | MG1655 $\Delta rcsB::frit \Delta rfaP::Kan^R$                                                                | This study <sup>a</sup> |
| GL205 | MG1655 $\Delta rcsB::frit \Delta nlpD::Kan^R$                                                                | This study <sup>a</sup> |
| GL203 | MG1655 $\Delta rcsB::frit \Delta lpp::Kan^R$                                                                 | This study <sup>a</sup> |
| GL207 | MG1655 $\Delta relA::frit \Delta tufA::Kan^R$                                                                | This study <sup>a</sup> |
| GL243 | MG1655 $\Delta relA::frit \Delta efp::Kan^R$                                                                 | This study <sup>a</sup> |
| GL62  | MG1655 $\Delta rcsB::frit \Delta slt::Kan^R$                                                                 | This study <sup>a</sup> |
| GL180 | MG1655 $\Delta relA::frit \Delta slt::Kan^R$                                                                 | This study <sup>a</sup> |
| GL68  | MG1655 $\Delta mepS::frit$                                                                                   | This study <sup>a</sup> |
| GL67  | MG1655 $\Delta ponB::frit$                                                                                   | This study <sup>a</sup> |
| TB153 | TB28 $\Delta mepS::Kan^R$                                                                                    | This study <sup>a</sup> |
| DL84  | TB28 $\Delta prc::frit$                                                                                      | This study <sup>a</sup> |
| HC604 | TB28 $\Delta prc::frit \Delta mepS::Kan^R$                                                                   | This study <sup>a</sup> |
| TU278 | TB28 $\Delta lysA::frit \Delta ampD::frit$                                                                   | [4]                     |
| HC533 | MG1655 $\Delta lysA::frit \Delta ampD::frit \Delta ponA::frit \Delta pbpC::frit \Delta mtgA::frit^{MS} ponB$ | [5]                     |

<sup>a</sup> The indicated strains were generated by P1 transduction by moving the indicated gene replacement alleles from the Keio collection [26] to the desired genetic background. In cases where the allele was unavailable or incorrect in our copy of the collection, equivalent mutants were regenerated by recombineering using strain TB10 and then transduced from this background. Kan<sup>R</sup> cassettes are flanked by *frit* sites for removal by FLP recombinase. An *frit* scar remains following removal of the cassette using FLP expressed from pCP20.

- <sup>b</sup>
1. Johnson JE, Lackner LL, Hale CA, de Boer PAJ. ZipA is required for targeting of DMinC/DicB, but not DMinC/MinD, complexes to septal ring assemblies in Escherichia coli. *J Bacteriol.* 2004;186: 2418–2429.
  2. Guyer MS, Reed RR, Steitz JA, Low KB. Identification of a sex-factor-affinity site in E. coli as gamma delta. *Cold Spring Harb Symp Quant Biol.* 1981;45 Pt 1: 135–140.
  3. Bernhardt TG, de Boer PAJ. Screening for synthetic lethal mutants in Escherichia coli and identification of EnvC (YibP) as a periplasmic septal ring factor with murein hydrolase activity. *Molecular Microbiology.* 2004;52: 1255–1269. doi:10.1111/j.1365-2958.2004.04063.x
  4. Cho H, Uehara T, Bernhardt TG. Beta-lactam antibiotics induce a lethal malfunctioning of the bacterial cell wall synthesis machinery. *Cell.* 2014;159: 1300–1311. doi:10.1016/j.cell.2014.11.017
  5. Cho H, Wivagg CN, Kapoor M, Barry Z, Rohs PDA, Suh H, et al. Bacterial cell wall biogenesis is mediated by SEDS and PBP polymerase families functioning semi-autonomously. *Nat Microbiol.* 2016;1: 16172. doi:10.1038/nmicrobiol.2016.172
