# Supplementary material for: The mecillinam resistome reveals a role for peptidoglycan endopeptidases in stimulating cell wall synthesis in Escherichia coli
Source: PubMed Central journal article supplement (PMC5549755; doi:10.1371/journal.pgen.1006934), 2017-07-27
Supplement: pgen.1006934.s007.pdf [file pgen.1006934.s007.pdf]

**Table S4. Plasmids used in this study.**

| Plasmid | Genotype <sup>a</sup>                                            | Origin | Source/Reference <sup>b</sup> |
|---------|------------------------------------------------------------------|--------|-------------------------------|
| pCP20   | <i>bla cat cl875 repA(Ts) P<sub>R</sub>::flp</i>                 | pSC101 | [1]                           |
| pInt-ts | <i>bla cl875 repA(Ts) P<sub>R</sub>::int<sup>h</sup></i>         | pSC101 | [2]                           |
| pTB63   | <i>tetA P<sub>native</sub>::ftsQAZ</i>                           | pSC101 | [3]                           |
| pHC432  | <i>cat attλ P<sub>ara</sub>::slmA</i>                            | R6K    | [4]                           |
| pHC739  | <i>cat attλ P<sub>tac</sub>::sulA</i>                            | R6K    | [5]                           |
| pHC800  | <i>cat P<sub>tac</sub>::empty</i>                                | ColE1  | [5]                           |
| pTK1    | <i>cat P<sub>tac</sub>::native RBS-mepM</i>                      | ColE1  | This study                    |
| pTK2    | <i>cat P<sub>tac</sub>::native RBS-mepS</i>                      | ColE1  | This study                    |
| pTK4    | <i>cat P<sub>tac</sub>::native RBS-mepA</i>                      | ColE1  | This study                    |
| pTKD4   | <i>cat P<sub>tac</sub>::native RBS-pbpG</i>                      | ColE1  | This study                    |
| pTKD8   | <i>cat P<sub>tac</sub>::native RBS-mepM(HLH[393-395]&gt;SLY)</i> | ColE1  | This study                    |
| pHC859  | <i>tetAR attHK P<sub>tac</sub>::sulA</i>                         | R6K    | [6]                           |
| pGL65   | <i>cat attλ P<sub>ara</sub>::phi10 RBS-relA(1-365)</i>           | R6K    | This study                    |
| pGL66   | <i>cat attλ P<sub>tac</sub>::phi10 RBS-mepS</i>                  | R6K    | This study                    |
| pGL67   | <i>cat attλ P<sub>tac</sub>::phi10 RBS-mepS(C68A)</i>            | R6K    | This study                    |
| pGL68   | <i>cat attλ P<sub>tac</sub>::phi10 RBS-rcsF</i>                  | R6K    | This study                    |
| pGL69   | <i>cat attλ P<sub>ara</sub>::empty</i>                           | R6K    | This study                    |
| pGL70   | <i>cat attλ P<sub>tac</sub>::empty</i>                           | R6K    | This study                    |

<sup>a</sup> P<sub>lac</sub>, P<sub>T7</sub>, P<sub>R</sub>, P<sub>ara</sub>, and P<sub>tac</sub> indicate the lactose, phage T7, λR, arabinose promoters, and the synthetic fusion promoter of tryptophan and lacUV5, respectively. Where relevant, the status of the ribosome binding site (RBS), either native or the phi10 RBS from phage T7, is indicated.

- <sup>b</sup> 1. Datsenko KA, Wanner BL. One-step inactivation of chromosomal genes in *Escherichia coli* K-12 using PCR products. *Proc Natl Acad Sci USA*. 2000;97: 6640–6645. doi:10.1073/pnas.120163297
2. Haldimann A, Wanner BL. Conditional-replication, integration, excision, and retrieval plasmid-host systems for gene structure-function studies of bacteria. *J Bacteriol*. 2001;183: 6384–6393. doi:10.1128/JB.183.21.6384-6393.2001
3. Bendezú FO, de Boer PAJ. Conditional lethality, division defects, membrane involution, and endocytosis in *mre* and *mrd* shape mutants of *Escherichia coli*. *J Bacteriol*. 2008;190: 1792–1811. doi:10.1128/JB.01322-07

4. Cho H, Bernhardt TG. Identification of the SlmA active site responsible for blocking bacterial cytokinetic ring assembly over the chromosome. *PLoS Genet.* 2013;9: e1003304. doi:10.1371/journal.pgen.1003304
5. Cho H, Uehara T, Bernhardt TG. Beta-lactam antibiotics induce a lethal malfunctioning of the bacterial cell wall synthesis machinery. *Cell.* 2014;159: 1300–1311. doi: 10.1016/j.cell.2014.11.017
6. Yunck R, Cho H, Bernhardt TG. Identification of MltG as a potential terminase for peptidoglycan polymerization in bacteria. *Molecular Microbiology.* 2015;99: 700–718. doi:10.1111/mmi.13258
